# Supplementary material for: Copolyfluorenes containing partially hydrolyzed phosphonate pendant groups: synthesis, characterization and application as electron injection layers for enhanced electroluminescence of PLEDs
Source: Royal Society of Chemistry journal article supplement (doi:10.1039/c4tc00758a), 2014-01-01
Supplement: c4tc00758a1.pdf [file c4tc00758a1.pdf]

## **Supporting Information**

### **Copolyfluorenes Containing Partially Hydrolyzed Phosphonate Pendant Groups: Synthesis, Characterization and Application as Electron Injection Layer for Enhanced Electroluminescence of PLEDs**

Chia-Shing Wu, Chen-Yi Chou and Yun Chen\*

*Department of Chemical Engineering, National Cheng Kung University, Tainan, Taiwan*

\*Corresponding author: yunchen@mail.ncku.edu.tw

#### **2,7-dibromo-9,9-bis(5'-bromopentyl) fluorene (1)**

A two-phase mixture of 2,7-dibromofluorene (5.0 g, 15.4 mmol), 1,5-dibromopropane (14.2 g, 61.7 mmol), tetrabutylammonium bromide (0.5 g, 1.55 mmol), and 50 wt% sodium hydroxide aqueous solution was stirred at 60 °C overnight under nitrogen. After diluting the reaction mixture with water, the organic layer was extracted with water and dichloromethane. The separated organic layer was collected and dried over magnesium sulfate, and dichloromethane was evaporated to obtain crude solids. The solids were purified by column chromatography (dichloromethane and hexane as the eluent) and recrystallization to obtain white monomer **1** (yield: 44%). <sup>1</sup>H NMR (CDCl<sub>3</sub>, 600 MHz, ppm.): δ 7.52~7.54 (d, 2H, Ar-H), 7.46~7.48 (d, 2H, Ar-H), 7.44 (s, 2H, Ar-H), 3.22~3.24 (t, 4H, -CH<sub>2</sub>Br), 1.93~1.96 (m, 4H, -CH<sub>2</sub>-), 1.60~1.65 (m, 4H, -CH<sub>2</sub>-), 1.19~1.24 (m, 4H, -CH<sub>2</sub>-), 0.58~0.63 (m, 4H, -CH<sub>2</sub>-). Anal. Calcd. For C<sub>13</sub>H<sub>8</sub>Br<sub>2</sub>: C, 44.40 %; H, 4.24 %. Found: C, 44.41 %; H, 4.21 %. Mp: 125-130 °C.



8H, -O-CH<sub>2</sub>-), 1.91~1.93 (m, 4H, -CH<sub>2</sub>-), 1.51~1.56 (m, 4H, -CH<sub>2</sub>-), 1.33~1.37 (m, 4H, -CH<sub>2</sub>-), 1.26~1.29 (t, 12H, -CH<sub>3</sub>), 1.13~1.18 (m, 4H, -CH<sub>2</sub>-), 0.57~0.59 (m, 4H, -CH<sub>2</sub>-). Anal. Calcd. For C<sub>31</sub>H<sub>46</sub>Br<sub>2</sub>O<sub>6</sub>P<sub>2</sub>: C, 50.56 %; H, 6.30 %. Found: C, 48.73 %; H, 6.47 %.

**2,7-bis(4,4,5,5-tetramethyl-1,3,2-dioxaborolan-2-yl)-9,9-bis(5'-diethoxylphosphorylpentyl)fluorene (3)**

A solution of 2,7-dibromo-9,9-bis(5'-diethoxylphosphorylpentyl)-fluorene (**2**) (2.0 g, 2.72 mmol), bis(pinacolato)diboron (2.1 g, 8.16 mmol), and potassium acetate (1.81 g, 18.44 mmol) in dry 1,4-dioxane (10 ml) with little amount of Pd(dppf)Cl<sub>2</sub> was heated to 80 °C overnight. The 1,4-dioxane was removed under reduced pressure and the solids were dissolved in dichloromethane, followed by extracting with water. The separated organic layer was collected and dried over magnesium sulfate, and dichloromethane was evaporated to obtain crude residue. The residue was purified by column chromatography (acetone and hexane as the eluent) and recrystallization to give monomer **3** as white solid (yield: 75%). <sup>1</sup>H NMR (CDCl<sub>3</sub>, 600 MHz, ppm.): δ 7.78~7.79 (d, 2H, Ar-H), 7.69~7.70 (d, 4H, Ar-H), 3.95~4.00 (m, 8H, -O-CH<sub>2</sub>-), 1.96~1.99 (m, 4H, -CH<sub>2</sub>-), 1.45~1.48 (m, 4H, -CH<sub>2</sub>-), 1.37 (s, 24H, -CH<sub>3</sub>), 1.24~1.29 (m, 4H, -CH<sub>2</sub>-), 1.01~1.11 (t, 12H, -CH<sub>3</sub>), 0.49~0.54 (m, 4H, -CH<sub>2</sub>-). Anal. Calcd. For C<sub>43</sub>H<sub>70</sub>B<sub>2</sub>O<sub>10</sub>P<sub>2</sub>: C, 62.18 %; H, 8.49 %. Found: C, 61.10 %; H, 8.52 %. Mp: 132 °C
